# Supplementary material
Source: Research Square preprint supplement (doi:10.21203/rs.3.rs-9586687/v1)
Supplement: Supplementary file 1 [file fe19f80b95745a19e0aa3f75.docx]

**Supplementary Table 1. Planning aims of OARs and target**

|  | **Hard dose constraints** | **Soft dose constraints** |
| --- | --- | --- |
| **PTV** | V95% > 95%  Dmax < 107% |  |
| **Bowel** | Dmax < 105% (47.3 Gy) | In case of Negative LNs: V40Gy < 100 cm³, V30Gy < 350 cm³  In case of Positive LNs: V40Gy < 250 cm³, V30Gy < 500 cm³  Dmax < 57.5 Gy |
| **Sigmoid** | Dmax < 105% (47.3 Gy) | Dmax < 57.5 Gy |
| **Bladder** | Dmax < 105% (47.3 Gy) | V40Gy < 75%  V30Gy < 85%  Dmax < 57.5 Gy |
| **Rectum** | Dmax < 105% (47.3 Gy) | V40Gy < 85%  V30Gy < 95%  Dmax < 57.5 Gy |
| **Femoral heads** | Dmax < 50 Gy |  |
| **Kidneys** | Dmean < 15 Gy | Dmean < 10 Gy |

OAR: organ at risk; PTV: planning target volume; LNs: lymph nodes; Dmax: maximum dose; Dmean: mean dose.

**Supplementary Table 2. Presenting symptoms of the study participants (n = 60)**

| **Symptom** | **n** | **Percentage (%)** |
| --- | --- | --- |
| Abnormal vaginal bleeding | 51 | 85.0% |
| Abnormal vaginal discharge | 33 | 55.0% |
| Pelvic pain | 28 | 46.7% |
| Dyspareunia | 16 | 26.7% |
| Sexually transmitted diseases | 1 | 1.7% |

Patients may present with more than one symptom.

**Supplementary Table 3. Treatment characteristics and dosimetric parameters (n = 60)**

| **Parameter** | **n** | **Percentage (%)** |
| --- | --- | --- |
| **Primary management** | | |
| Concurrent chemo-radiotherapy (CCRTH) | 54 | 90.0% |
| Chemotherapy + CCRTH | 6 | 10.0% |
| **EBRT dose** | | |
| 45 Gy / 25 fractions | 35 | 58.3% |
| 50 Gy / 28 fractions | 25 | 41.7% |
| **Brachytherapy dose** | | |
| 7 Gy × 3 fractions | 20 | 33.3% |
| 7 Gy × 4 fractions | 38 | 63.3% |
| Less than 2 fractions | 2 | 3.3% |
| **Chemotherapy agent** | | |
| Cisplatin | 51 | 85.0% |
| Carboplatin | 9 | 15.0% |
| **Chemotherapy cycles** | | |
| ≤ 3 cycles | 11 | 18.3% |
| > 3 cycles | 49 | 81.7% |
| **Applicator type** | | |
| Tandem + ring | 53 | 88.3% |
| Tandem + ovoid | 7 | 11.7% |
| **Dosimetric parameters** | | |
| Haemoglobin during radiotherapy (g/dl), Mean ± SD | 9.88 ± 0.73 | |
| Initial tumour volume (cm³), Median (IQR) | 52.00 (27.37–81.50) | |
| CTVₕᴿ volume (cm³), Median (IQR) | 15.00 (11.13–18.87) | |
| Tumour volume after EBRT (cm³), Median (IQR) | 4.25 (2.04–9.00) | |
| **Target dose (EQD2₁₀)** | | |
| D₉₈ CTVₕᴿ, Gy, Mean ± SD | 81.03 ± 7.38 | |
| D₉₀ CTVₕᴿ, Gy, Mean ± SD | 95.17 ± 7.76 | |
| D₉₈ CTVᴵᴿ, Gy, Mean ± SD | 65.62 ± 7.05 | |
| **OAR dose (EQD2₃)** | | |
| Bladder D₂cm³, Gy, Mean ± SD | 81.35 ± 9.97 | |
| Rectum D₂cm³, Gy, Mean ± SD | 64.61 ± 7.62 | |
| Sigmoid D₂cm³, Gy, Mean ± SD | 55.79 ± 8.91 | |
| Overall treatment time (days), Mean ± SD | 71.09 ± 18.25 | |

CCRTH: concurrent chemo-radiotherapy; EBRT: external beam radiotherapy; CTVₕᴿ: high-risk clinical target volume; CTVᴵᴿ: intermediate-risk clinical target volume; EQD2: equivalent dose in 2 Gy fractions; OAR: organ at risk; IQR: interquartile range.

**Supplementary Table 4. Clinical outcomes after image-guided brachytherapy (n = 60)**

| **Parameter** | **n** | **Percentage (%)** |
| --- | --- | --- |
| **Response after EBRT (n = 59)** | | |
| Complete response | 12 | 20.3% |
| Marked response | 37 | 62.7% |
| Partial response | 10 | 16.9% |
| **Response after brachytherapy (n = 60)** | | |
| Complete response | 54 | 90.0% |
| Partial response | 6 | 10.0% |
| **Failure pattern** | | |
| Local failure | 2 | 3.3% |
| Nodal failure | 3 | 5.0% |
| Distant failure | 7 | 11.7% |
| **Site of distant metastasis (n = 7)** | | |
| Bone | 3 | 5.0% |
| Lung | 2 | 3.3% |
| Liver | 1 | 1.7% |
| Gastric mass | 1 | 1.7% |

BT: brachytherapy; EBRT: external beam radiotherapy.

**Supplementary Table 5. Treatment-related toxicities (n = 60)**

| **Toxicity** | **n** | **Percentage (%)** |
| --- | --- | --- |
| **Acute skin toxicity** | | |
| Grade 1 | 21 | 35.0% |
| Grade 2 | 7 | 11.7% |
| **Acute intestinal toxicity** | | |
| Grade 1 | 8 | 13.3% |
| Grade 2 | 2 | 3.3% |
| **Acute renal toxicity** | | |
| Grade 1 | 4 | 6.7% |
| **Chronic proctitis** | | |
| Grade 1 | 2 | 3.3% |
| **Cystitis** | | |
| Grade 1 | 12 | 20.0% |
| Grade 2 | 9 | 15.0% |
| **Vaginal toxicity** | | |
| Grade 1 | 10 | 16.7% |
| Grade 2 | 3 | 5.0% |
| Grade 3 | 1 | 1.7% |
| **Haematological toxicity** | | |
| Grade 1 | 21 | 35.0% |
| Grade 2 | 8 | 13.3% |
| **Chronic renal toxicity** | | |
| Grade 1 | 6 | 10.0% |

Toxicities graded according to RTOG criteria. Only patients experiencing toxicity are listed.

**Supplementary Table 6. Univariable Cox proportional hazard regression analysis of factors affecting overall survival**

| **Variable** | **HR** | **95% CI Lower** | **95% CI Upper** | **p-value** |
| --- | --- | --- | --- | --- |
| Tumour volume after EBRT | 5.984 | 1.866 | 19.190 | **0.003** |
| CTVₕᴿ volume ≥ 30 cm³ | 5.502 | 1.455 | 20.801 | **0.012** |
| Local recurrence | 5.940 | 1.273 | 27.719 | **0.023** |
| Nodal recurrence | 5.808 | 1.235 | 27.328 | **0.026** |
| Chemotherapy cycles ≤ 3 | 3.663 | 1.150 | 11.673 | **0.028** |
| Overall metastasis | 3.515 | 1.099 | 11.237 | **0.034** |
| Distant recurrence | 1.721 | 0.370 | 8.015 | 0.480 |
| Overall treatment time | 1.009 | 0.978 | 1.041 | 0.582 |
| Chemotherapy type (Carboplatin) | 1.423 | 0.385 | 5.264 | 0.597 |
| Initial tumour volume | 1.001 | 0.985 | 1.016 | 0.934 |

HR: hazard ratio; CI: confidence interval; EBRT: external beam radiotherapy; CTVₕᴿ: high-risk clinical target volume. Bold red p-values indicate statistically significant predictors (p < 0.05).
